# Supplementary material for: Thermal annealing effects on La2Hf2O7:Eu3+ nanoparticles: a curious case study of structural evolution and site-specific photo- and radio-luminescence
Source: Royal Society of Chemistry journal article supplement (doi:10.1039/c8qi00713f), 2018-01-01
Supplement: c8qi00713f1.pdf [file c8qi00713f1.pdf]

## Electronic Supplementary Information

### Thermal annealing effects on $\text{La}_2\text{Hf}_2\text{O}_7:\text{Eu}^{3+}$ nanoparticles: A curious case study of structural evolution and site-specific photo- and radio-luminescence

Santosh K. Gupta<sup>1,2</sup>, Jose P Zuniga<sup>1</sup>, Maya Abdou<sup>1</sup>, and Yuanbing Mao<sup>1,3\*</sup>

<sup>1</sup>Department of Chemistry, University of Texas Rio Grande Valley, 1201 West University Drive, Edinburg, Texas 78539, USA

<sup>2</sup>Radiochemistry Division, Bhabha Atomic Research Centre, Trombay, Mumbai-400085, India

<sup>3</sup>School of Earth, Environmental, and Marine Sciences, University of Texas Rio Grande Valley, 1201 West University Drive, Edinburg, Texas 78539, USA

\*To whom correspondence should be addressed. Electronic mail: yuanbing.mao@utrgv.edu, Tel.: +1-956-665-2986.

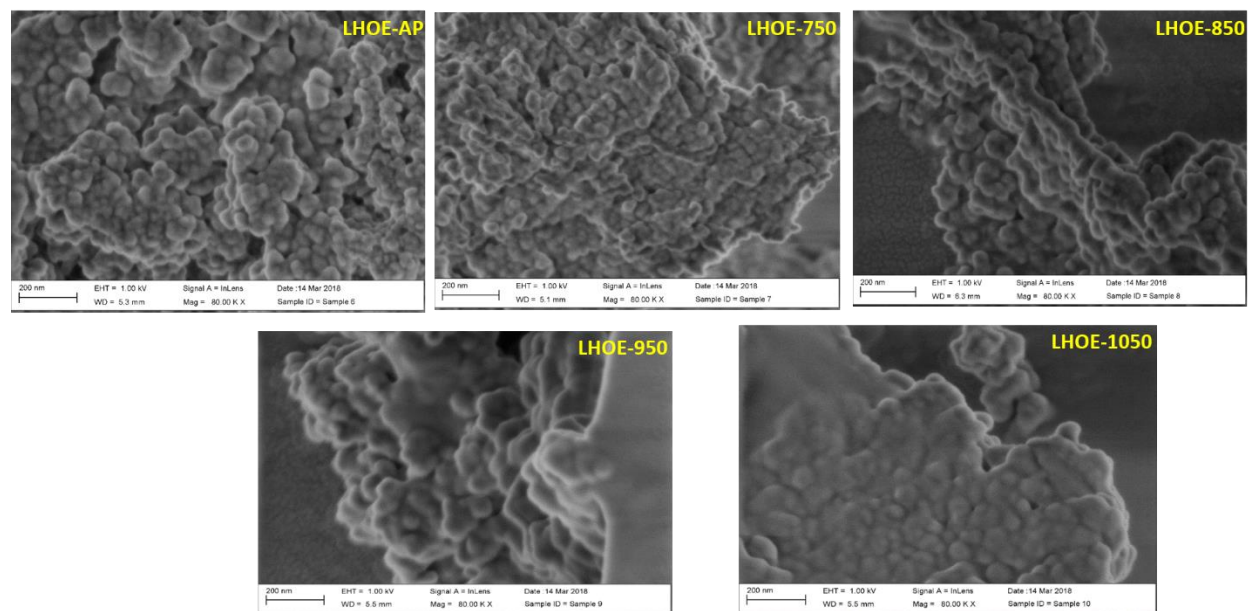

**Figure S1.** SEM images of the  $\text{La}_2\text{Hf}_2\text{O}_7:\text{Eu}^{3+}$  NPs annealed at various temperatures.

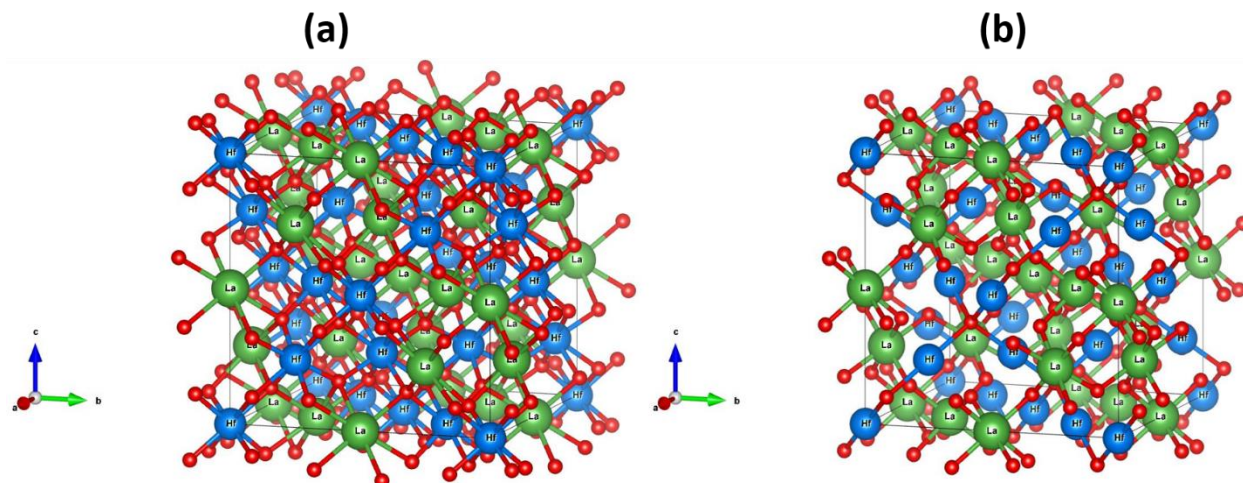

**Figure S2.** (a) Crystal Structure of (a) the undoped  $\text{La}_2\text{Hf}_2\text{O}_7$  and (b) 5%  $\text{Eu}^{3+}$  doped  $\text{La}_2\text{Hf}_2\text{O}_7$  NPs synthesized at  $650^\circ\text{C}$ .

**Table S1.** Rietveld analysis parameters from the XRD patterns of the  $\text{La}_2\text{Hf}_2\text{O}_7$  NPs

| Molecular formula           | $\text{La}_2\text{Hf}_2\text{O}_7\text{-AP}$ | $\text{La}_2\text{Hf}_2\text{O}_7:\text{Eu}^{3+}\text{-AP}$ |
|-----------------------------|----------------------------------------------|-------------------------------------------------------------|
| Space Group                 | Fm-3m (No 227)                               | Fm-3m (No 227)                                              |
| Crystal System              | Cubic                                        | Cubic                                                       |
| Point Group                 | m-3m                                         | m-3m                                                        |
| Bravais lattice             | F                                            | F                                                           |
| <b>Unit cell parameters</b> |                                              |                                                             |
| $a = b = c$ (Å)             | 10.773(1)                                    | 10.765(1)                                                   |
| $\alpha = \beta = \gamma$   | $90^\circ$                                   | $90^\circ$                                                  |
| Cell Volume                 | $1250.323(25) \text{ \AA}^3$                 | $1247.748(25) \text{ \AA}^3$                                |
| Density                     | 7.935 g/cc                                   | 7.951 g/cc                                                  |
| Bragg Factor                | 1.81                                         | 12.36                                                       |
| RF factor                   | 1.80                                         | 2.23                                                        |
| Chi-square                  | 1.25                                         | 1.22                                                        |
| Rp                          | 10.9                                         | 12.6                                                        |
| Rwp                         | 11.3                                         | 12.7                                                        |
| Re                          | 10.1                                         | 11.5                                                        |

**Table S2.** Structure parameters obtained from Rietveld Refinement of the XRD pattern of the  $\text{La}_2\text{Hf}_2\text{O}_7$  NPs

|    | x       | y       | z       | Occ.  | B     | Site | Symm. |
|----|---------|---------|---------|-------|-------|------|-------|
| La | 0.50000 | 0.50000 | 0.50000 | 1.000 | 1.000 | 16d  | -3m   |
| O  | 0.34300 | 0.12500 | 0.12500 | 1.000 | 1.000 | 48f  | 2mm   |
| Hf | 0.00000 | 0.00000 | 0.00000 | 1.000 | 1.000 | 16c  | -3m   |
| O' | 0.12500 | 0.12500 | 0.12500 | 1.000 | 1.000 | 8a   | -43m  |

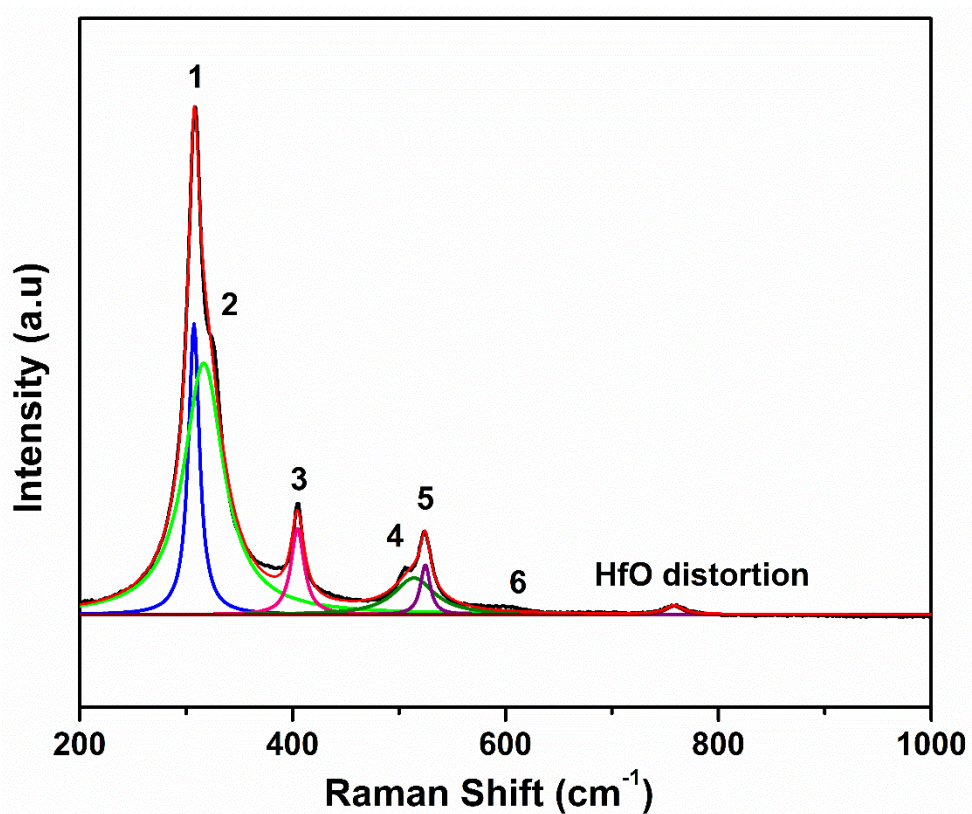

**Figure S3.** Gaussian deconvoluted Raman bands of the LHOE-1050 NPs with ideal pyrochlore structure.

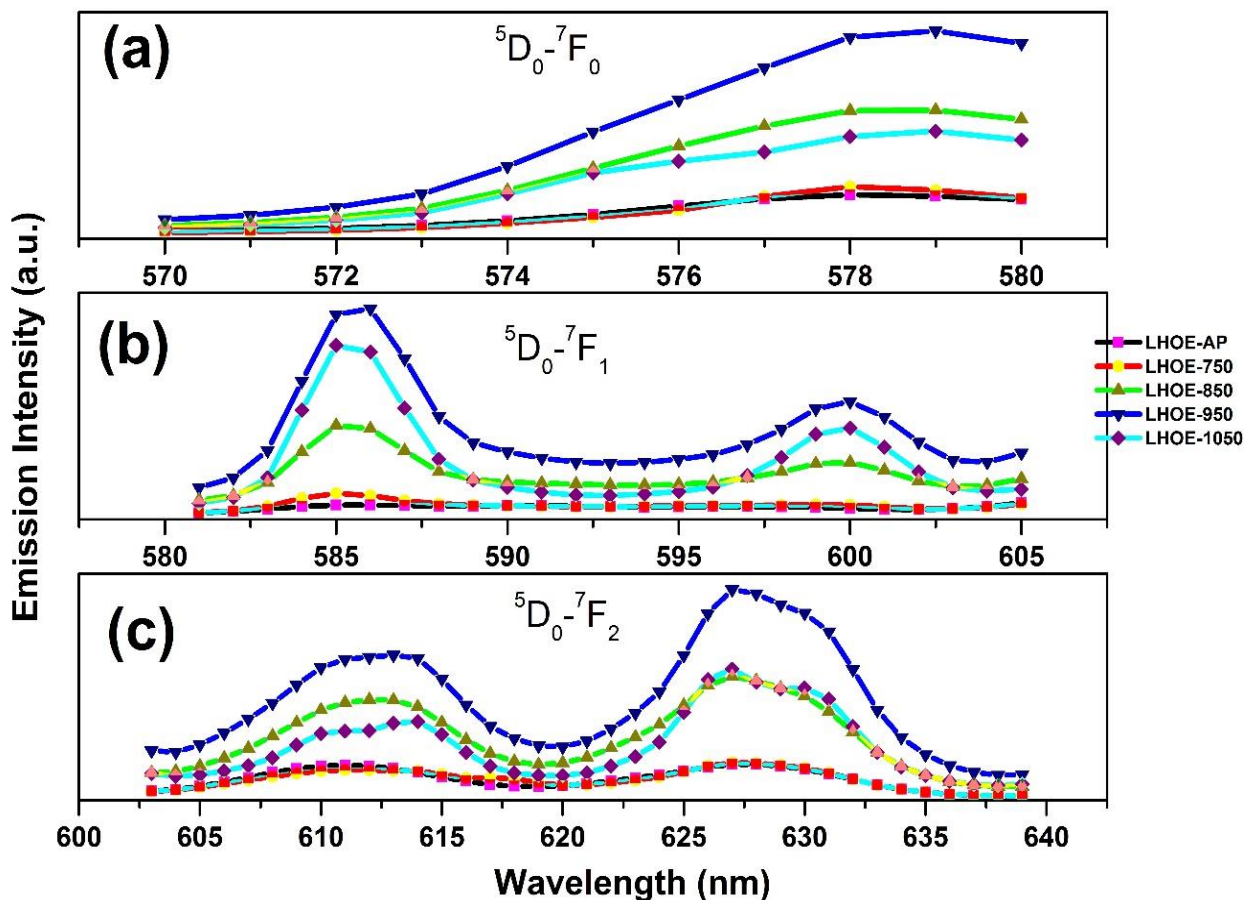

**Figure S4.** Stark splitting pattern of various transitions of the  $\text{La}_2\text{Hf}_2\text{O}_7:\text{Eu}^{3+}$  NPs annealed at various temperatures.

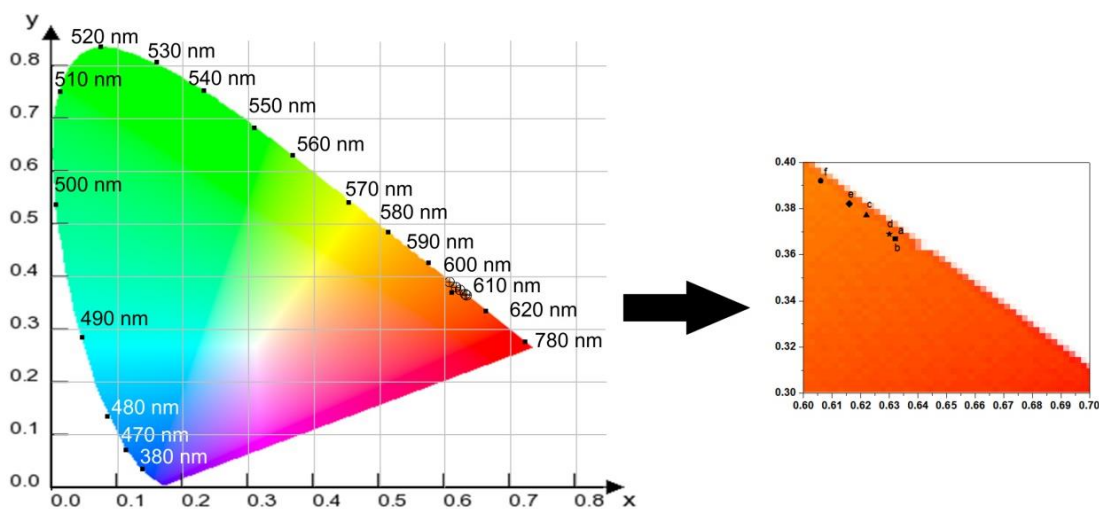

**Figure S5.** CIE chromaticity diagram coordinates of the  $\text{La}_2\text{Hf}_2\text{O}_7:\text{Eu}^{3+}$  NPs (950°C annealed) at various excitation wavelength. Right panel presents a detailed view of these coordinates in the red-end wavelengths.



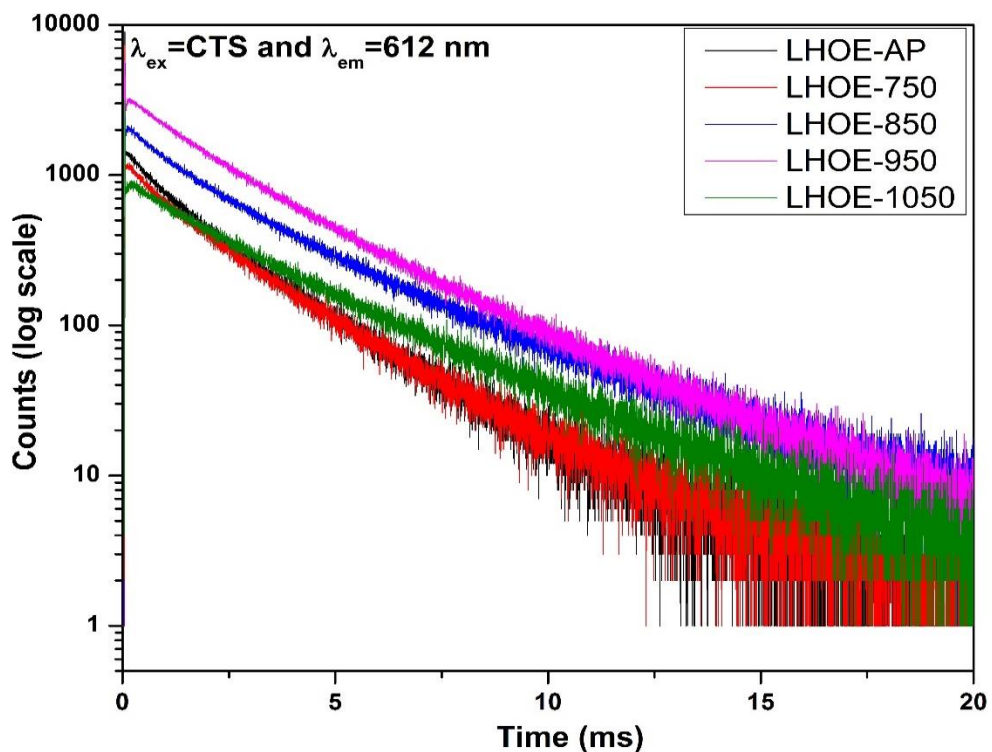

**Figure S6.** Luminescence lifetime of the  $\text{La}_2\text{Hf}_2\text{O}_7:\text{Eu}^{3+}$  NPs as a function of annealing temperature.

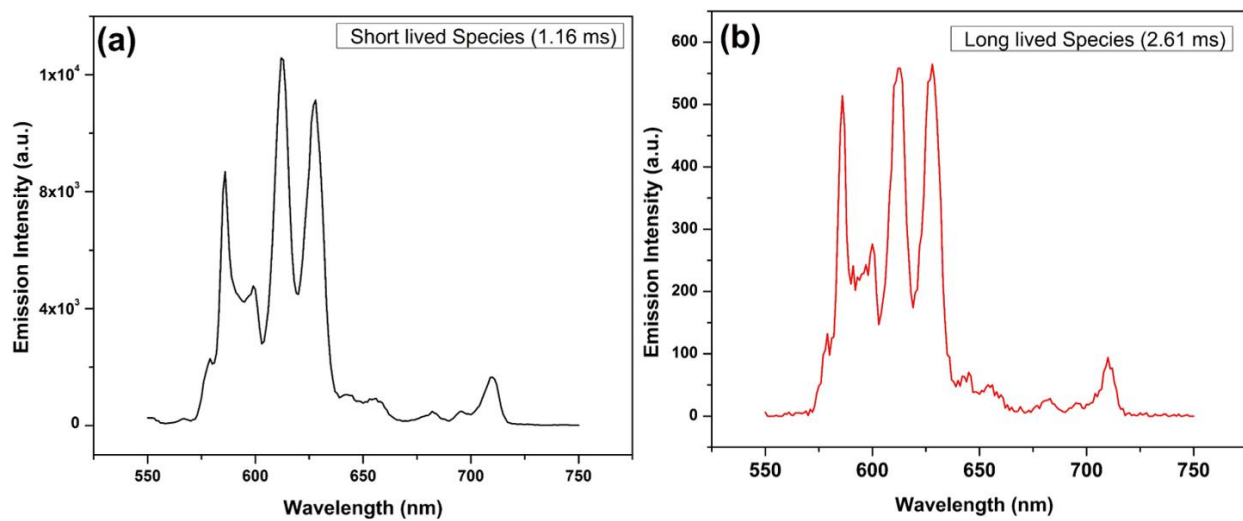

**Figure S7.** Time resolved emission spectra of the short and long-lived europium ions in the  $\text{La}_2\text{Hf}_2\text{O}_7:\text{Eu}^{3+}$  NPs.
